# Supplementary material for: Tyrosine Kinase Syk Non-Enzymatic Inhibitors and Potential Anti-Allergic Drug-Like Compounds Discovered by Virtual and In Vitro Screening
Source: PubMed Central journal article supplement (PMC3118801; doi:10.1371/journal.pone.0021117), 2011-06-20
Supplement: pone.0021117.s001.pdf [file pone.0021117.s001.pdf]

Table S1.

| ID ChemBridge | Cluster | Kd ( $\mu$ M) | Antibody Inhibition | IC50 Cell Degranulation | MW     | logP | tPSA   | HBD | HBA | State / FAFdrug2 | Detected Problems |
|---------------|---------|---------------|---------------------|-------------------------|--------|------|--------|-----|-----|------------------|-------------------|
| 6752784       | 1       | 5             | 86.5 %              | **                      | 496.94 | 5.57 | 79.73  | 1   | 6   | Accepted         | -                 |
| 6670340       | 1       | 16.3          | 81%                 | **                      | 453.51 | 3.02 | 122.13 | 1   | 8   | Accepted         | -                 |
| 6422575       | single  | 6.2           | 81%                 | **                      | 497.31 | 4.1  | 94.01  | 1   | 7   | Rejected         | Max Ring Size     |
| 6882059       | 1       | 9.4           | 79.5 %              | **                      | 451.53 | 3.35 | 76.27  | 2   | 7   | Accepted         | -                 |
| 7111786       | 1       | -             | 77.5 %              | **                      | 447.48 | 3.01 | 93.89  | 1   | 8   | Accepted         | -                 |
| 6203863       | 1       | 6.1           | 73.5 %              | **                      | 487.50 | 4.71 | 102.37 | 1   | 8   | Accepted         | -                 |
| 7347627       | 1       | -             | 72%                 | **                      | 451.53 | 3.35 | 76.27  | 2   | 7   | Accepted         | -                 |
| 7489416       | 1       | -             | 71%                 | **                      | 514.38 | 5.27 | 115.31 | 2   | 6   | Accepted         | -                 |
| 6719738       | 1       | -             | 71%                 | **                      | 480.48 | 5.04 | 79.73  | 1   | 6   | Accepted         | -                 |
| 6650234       | 1       | 6.3           | 71%                 | **                      | 480.50 | 5.33 | 125.04 | 1   | 7   | Accepted         | -                 |
| 6652639       | 1       | -             | 70.5 %              | **                      | 444.47 | 3.72 | 88.96  | 1   | 7   | Accepted         | -                 |
| 6673225       | 1       | -             | 69%                 | **                      | 478.51 | 4.84 | 134.27 | 1   | 8   | Accepted         | -                 |
| 6800873       | single  | 4.6           | 67.5 %              | **                      | 467.51 | 4.78 | 76.07  | 1   | 6   | Accepted         | -                 |
| 6879058       | 1       | -             | 67.5 %              | **                      | 438.49 | 1.92 | 89.16  | 2   | 8   | Accepted         | -                 |
| 6282824       | 2       | 5.6           | 67.5 %              | 5 $\mu$ M               | 458.53 | 4.15 | 111.41 | 1   | 7   | Accepted         | -                 |
| 6750319       | 1       | -             | 67%                 | **                      | 448.49 | 4.86 | 125.04 | 1   | 7   | Accepted         | -                 |
| 6474819       | single  | 17.9          | 63%                 | **                      | 429.57 | 5.63 | 38.53  | 2   | 4   | Accepted         | -                 |
| 6498669       | 3       | 0.8           | 63%                 | **                      | 467.53 | 2.78 | 127.18 | 3   | 8   | Accepted         | -                 |
| 6651552       | 1       | -             | 60%                 | **                      | 467.55 | 4.24 | 67.04  | 2   | 6   | Accepted         | -                 |
| 6453860       | 3       | -             | 60%                 | **                      | 454.51 | 5.65 | 76.66  | 2   | 6   | Accepted         | -                 |
| 6853966       | 3       | -             | 58%                 | **                      | 469.51 | 2.4  | 131.21 | 3   | 9   | Accepted         | -                 |
| 6866968       | single  | -             | 57.5%               | **                      | 464.61 | 3.82 | 61.78  | 3   | 6   | Accepted         | -                 |
| 7938324       | single  | -             | 57%                 | **                      | 444.52 | 3.49 | 107.5  | 0   | 6   | Accepted         | -                 |
| 6905988       | 1       | -             | 57%                 | **                      | 455.49 | 3.08 | 76.27  | 2   | 7   | Accepted         | -                 |
| 6885782       | 1       | -             | 56.5%               | **                      | 532.00 | 3.55 | 94.73  | 2   | 9   | Accepted         | -                 |
| 6663684       | 1       | -             | 56.5%               | **                      | 435.53 | 3.78 | 67.04  | 2   | 6   | Accepted         | -                 |
| 6672500       | 1       | -             | 55%                 | **                      | 487.95 | 3.22 | 85.5   | 2   | 8   | Accepted         | -                 |
| 7721949       | 1       | -             | 54%                 | **                      | 453.55 | 4.07 | 76.27  | 2   | 7   | Accepted         | -                 |
| 7966545       | 2       | 6.7           | 53.5%               | **                      | 486.52 | 3.33 | 123.27 | 2   | 8   | Accepted         | -                 |
| 7437580       | single  | -             | 51%                 | **                      | 481.56 | 3.0  | 125.46 | 2   | 8   | Accepted         | -                 |
| 6654239       | 1       | -             | 50%                 | **                      | 471.49 | 2.7  | 85.5   | 2   | 8   | Accepted         | -                 |
| 6670570       | 1       | -             | 50%                 | **                      | 500.58 | 1.8  | 112.8  | 2   | 9   | Accepted         | -                 |
| 6670673       | 1       | -             | 50%                 | **                      | 471.49 | 2.7  | 85.5   | 2   | 8   | Accepted         | -                 |
| 6670747       | 1       | -             | 50%                 | **                      | 437.50 | 2.99 | 76.27  | 2   | 7   | Accepted         | -                 |
| 6671401       | 1       | -             | 50%                 | **                      | 443.46 | 1.99 | 98.64  | 2   | 9   | Accepted         | -                 |
| 6677533       | 1       | -             | 50%                 | **                      | 459.53 | 2.61 | 113.74 | 2   | 8   | Accepted         | -                 |
| 6683618       | 1       | -             | 50%                 | **                      | 457.92 | 3.25 | 76.27  | 2   | 7   | Accepted         | -                 |
| 6417902       | single  | -             | 49.5%               | **                      | 478.62 | 4.19 | 66.27  | 1   | 6   | Accepted         | -                 |
| 6437157       | single  | -             | 49.5%               | **                      | 461.89 | 5.48 | 80.75  | 0   | 6   | Accepted         | -                 |
| 6465972       | 3       | -             | 49%                 | **                      | 484.56 | 4.17 | 102.55 | 1   | 8   | Accepted         | -                 |
| 7723671       | 1       | -             | 48.5%               | **                      | 485.52 | 3.05 | 85.5   | 2   | 8   | Accepted         | -                 |
| 6648368       | 1       | -             | 48.5%               | **                      | 459.91 | 3.74 | 67.04  | 2   | 6   | Accepted         | -                 |
| 6656195       | 1       | -             | 48.5%               | **                      | 453.52 | 3.88 | 67.04  | 2   | 6   | Accepted         | -                 |
| 7778331       | single  | 3             | 48%                 | **                      | 475.58 | 1.73 | 105.55 | 3   | 9   | Accepted         | -                 |
| 6994060       | 2       | -             | 47.5%               | **                      | 485.98 | 3.15 | 115.85 | 2   | 8   | Accepted         | -                 |
| 6458830       | 3       | -             | 47%                 | **                      | 492.65 | 4.56 | 66.27  | 1   | 6   | Accepted         | -                 |

|         |        |      |       |            |        |      |        |   |    |              |                       |
|---------|--------|------|-------|------------|--------|------|--------|---|----|--------------|-----------------------|
| 7524107 | 2      | 5.5  | 46.5% | **         | 445.48 | 5.2  | 104.4  | 2 | 7  | Accepted     | -                     |
| 6661524 | 1      | -    | 46.5% | **         | 541.46 | 3.79 | 103.57 | 2 | 8  | Accepted     | -                     |
| 7739436 | 1      | -    | 46%   | **         | 438.49 | 2.86 | 89.16  | 2 | 8  | Accepted     | -                     |
| 6881804 | 1      | -    | 46%   | **         | 445.48 | 2.74 | 98.64  | 2 | 9  | Accepted     | -                     |
| 6907921 | 1      | -    | 45.5% | **         | 427.47 | 2.42 | 89.41  | 2 | 8  | Accepted     | -                     |
| 7495334 | 2      | 1.6  | 43%   | 10 $\mu$ M | 450.46 | 2.69 | 145.65 | 1 | 9  | Accepted     | -                     |
| 7509862 | 4      | -    | 42.5  | 10 $\mu$ M | 515.58 | 4.37 | 131.3  | 2 | 8  | Intermediate | Flagged Group Nitrile |
| 7325385 | 1      | -    | 42%   | **         | 495.58 | 3.68 | 85.5   | 2 | 8  | Accepted     | -                     |
| 6669449 | 4      | -    | 42%   | **         | 424.40 | 4.39 | 127.16 | 3 | 8  | Intermediate | Flagged Group Nitrile |
| 7348779 | single | -    | 40%   | **         | 438.55 | 4.58 | 59.08  | 0 | 6  | Accepted     | -                     |
| 7501888 | 2      | 8.2  | 40%   | 4 $\mu$ M  | 539.04 | 5.27 | 112.8  | 1 | 8  | Accepted     | -                     |
| 6946138 | 4      | -    | 40%   | **         | 415.41 | 5.47 | 85.64  | 0 | 6  | Accepted     | -                     |
| 7722851 | 5      | 21.8 | 39.5% | 4 $\mu$ M  | 523.00 | 3.59 | 128.09 | 1 | 8  | Accepted     | -                     |
| 7517583 | single | -    | 38.5% | **         | 476.47 | 2.22 | 102.45 | 0 | 9  | Accepted     | -                     |
| 6634701 | single | -    | 38.5% | 10 $\mu$ M | 470.54 | 4.23 | 102.74 | 0 | 7  | Rejected     | -                     |
| 7726450 | 1      | -    | 37.5% | **         | 458.46 | 2.74 | 110.69 | 1 | 9  | Accepted     | -                     |
| 6662088 | 1      | -    | 37%   | **         | 515.60 | 1.09 | 125.69 | 2 | 10 | Accepted     | -                     |
| 7752193 | 2      | 8    | 35%   | 10 $\mu$ M | 451.54 | 3.1  | 115.85 | 2 | 8  | Intermediate | Flagged Group Alkene  |
| 7238569 | single | -    | 32%   | **         | 478.56 | 3.54 | 132.82 | 4 | 8  | Accepted     | -                     |
| 7724000 | 1      | -    | 30%   | **         | 469.48 | 2.92 | 85.5   | 2 | 8  | Accepted     | -                     |
| 7443270 | 2      | -    | 30%   | 10 $\mu$ M | 451.49 | 3.26 | 120.89 | 1 | 8  | Accepted     | -                     |
| 7245019 | single | -    | 30%   | **         | 428.47 | 4.99 | 76.05  | 1 | 6  | Accepted     | -                     |
| 6909597 | 1      | -    | 29%   | **         | 457.92 | 3.25 | 76.27  | 2 | 7  | Accepted     | -                     |
| 7661882 | 2      | -    | 28%   | **         | 443.49 | 4.01 | 74.86  | 1 | 7  | Accepted     | -                     |
| 7667791 | single | -    | 28%   | **         | 434.48 | 3.5  | 82.21  | 2 | 7  | Accepted     | -                     |
| 6891745 | 1      | -    | 27.5% | **         | 467.53 | 2.95 | 85.5   | 2 | 8  | Accepted     | -                     |
| 7783660 | 2      | 4.8  | 27%   | 10 $\mu$ M | 507.60 | 3.74 | 132.92 | 2 | 9  | Intermediate | Flagged Group Alkene  |
| 7653478 | single | -    | 27%   | **         | 451.54 | 3.12 | 91.36  | 2 | 9  | Accepted     | -                     |
| 7723330 | 5      | -    | 26%   | **         | 501.48 | 2.88 | 114.48 | 1 | 10 | Accepted     | -                     |
| 7199725 | 2      | -    | 25%   | **         | 440.55 | 4.62 | 49.61  | 2 | 5  | Accepted     | -                     |
| 6987235 | single | -    | 25%   | **         | 476.00 | 5.28 | 50.77  | 0 | 4  | Rejected     | Max Ring Size         |
| 7140931 | single | -    | 24.5% | **         | 472.59 | 3.47 | 92.37  | 0 | 7  | Accepted     | -                     |
| 7787455 | 3      | -    | 20%   | **         | 454.49 | 3.36 | 110.39 | 1 | 8  | Accepted     | -                     |
| 7660465 | single | 3.2  | 20%   | 15 $\mu$ M | 536.87 | 4.33 | 106.62 | 2 | 7  | Accepted     | -                     |
| 7661751 | 1      | -    | 19%   | **         | 466.50 | 1.66 | 98.39  | 2 | 9  | Accepted     | -                     |
| 7722914 | 5      | 15.6 | 19%   | 15 $\mu$ M | 513.62 | 2.29 | 116.79 | 2 | 9  | Accepted     | -                     |
| 7745040 | 1      | -    | 18%   | **         | 542.39 | 4.05 | 89.41  | 2 | 8  | Accepted     | -                     |
| 7735385 | 1      | -    | 17%   | **         | 464.53 | 3.79 | 93.07  | 2 | 8  | Accepted     | -                     |
| 7756003 | single | -    | 11%   | 10 $\mu$ M | 484.61 | 4.5  | 104.57 | 0 | 7  | Accepted     | -                     |
